# Supplementary material
Source: publisher figshare collection journal article supplement (https://frontiersin.figshare.com/ndownloader/files/17937959)

**Cell Factory Design and Culture Process Optimization for Dehydroshikimate  
Biosynthesis in *Escherichia coli***

**Si-Sun Choi<sup>1&</sup>, Seung-Yeul Seo<sup>2,4&</sup>, Sun-Ok Park<sup>2</sup>, Han-Na Lee<sup>1,2</sup>, Ji-soo Song<sup>1</sup>, Ji-yeon Kim<sup>1</sup>, Ji-Hoon Park<sup>1</sup>, Sangyong Kim<sup>3,5</sup>, Sang Joung Lee<sup>2</sup>, Gie-Taek Chun<sup>4,\*</sup>, and Eung-Soo Kim<sup>1,\*</sup>**

<sup>1</sup>Department of Biological Engineering, Inha University, Incheon 22212, Republic of Korea

<sup>2</sup>STR Biotech Co., Ltd., Bioplaza 4-3, 56, Soyanggang-ro, Chuncheon-si, Gangwon-do 24232, Republic of Korea

<sup>3</sup>Green Chemistry and Materials Group, Korea Institute of Industrial Technology, Cheonan si, Chungcheongnam-do, 31056, Republic of Korea

<sup>4</sup>Department of Molecular Bio-science, Kangwon National University, Chuncheon-si, Gangwon-do 24341, Republic of Korea

<sup>5</sup>Green Process and System Engineering Major, Korea University of Science and Technology (UST), Daejeon, 34141, Republic of Korea.

<sup>&</sup>Equal contribution

<sup>\*</sup>Corresponding authors: Eung-Soo Kim & Gie-Taek Chun

## Supplementary

**Table 1. PCR primers of *E. coli* study for construction of plasmids and genome confirm**

| Primer | Forward(F)                                                     | Target                                  |
|--------|----------------------------------------------------------------|-----------------------------------------|
|        | Reverse(R)                                                     |                                         |
| R1     | F 5'- CAGGTGATGGATGTCGACAAACCACTACCG – 3'                      | <i>tyrR</i>                             |
| R2     | R 5'- TCGACAGAGAGCAAAGCTTCAGGCAACGCC – 3'                      |                                         |
| R3     | F 5'- ACTGACACAACCTCGAGGGTTATGAGCTGCG – 3'                     |                                         |
| R4     | R 5'- GCATCGCAACGCCTGGATCCGCCAATAGCT – 3'                      |                                         |
| G1     | F 5'- TTACATATGCGGGATCCGGTAGGCGAACGT – 3'                      | <i>ptsG</i>                             |
| G2     | R 5'- CATGGTTTTAACCATCTAGACATAGGCAACAACCTCGAGCCAGCGCGGATA – 3' |                                         |
| G3     | F 5'- TCCACGCGATTCTAGAAGGCTGGCATTCCCAAGCTTTATTCTTCTGGGG – 3'   |                                         |
| G4     | R 5'- GTCGACCTACGCCAGCTATA – 3'                                |                                         |
| A1     | F 5'- CAACCGCGCCGTCGACTTGCTC – 3'                              | <i>pykA</i>                             |
| A2     | R 5'- CAAACGGCTTCTAGACGTTCAAGCTTGGCAACAA – 3'                  |                                         |
| A3     | F 5'- CGTTTCTAGACACCGTCTCGAGGTTCAAGTTCGAC – 3'                 |                                         |
| A4     | R 5'- CCGCAAGGATCCGTGATCCATTCT – 3'                            |                                         |
| I1     | F 5'- ATTCGGATCCTGCTCATCCATGACCTGACC -3'                       | <i>lacI</i>                             |
| I2     | R 5'- GAACTCTAGATAATGCAGCTGGCACGACAG -3'                       |                                         |
| I3     | F 5'- ATGGTCTAGAGAATGTAATTCAGCTCCGCC -3'                       |                                         |
| I4     | R 5'- ATGCGTCGACTTGTGCGCTCAGTATAGGAAG -3'                      |                                         |
| Plac1  | F 5'- GAGGGGATCCAGATCGCGGCCGCGCAATTAATGTGAGTTAGCTC -3'         | pUC18                                   |
| Plac2  | R 5'- TCTAGAAATAATTTTAATTGTTATCCGCTCACAAT -3'                  |                                         |
| RBS1   | F 5'- TCTAGAAATAATTTTGTTTA -3'                                 | pET-                                    |
| RBS2   | R 5'- GGCGAATTCGAAGCTCATATGTATATCTCCTTCTT -3'                  | 21b(+)                                  |
| B1     | F 5'- TAAGAAGGAGATATACATATGGAGAGGATTGTCGTTACT -3'              | <i>E. coli</i><br>K12<br>Genomic<br>DNA |
| B2     | R 5'- CAGTTACGGTTTTCATTACGCTGATTGACAATCGG -3'                  |                                         |
| D1     | F 5'- ATGAAAACCGTAACTGTAAAA -3'                                |                                         |
| D2     | R 5'- GGCGGGTGTGCGGGCAAGCTTTTATGCCTGGTGTAATAAGTT -3'           |                                         |
| A3     | F 5'- CTCCGCGCCGCCATGCACATAACCCCGCGCGACTAA -3'                 |                                         |
| A4     | R 5'- CCCGCGCGCCGCCATGCACAAAAGGATTGTTGATG -3'                  |                                         |
| P1     | F 5'- AGGAGATATACTCGAATGCCTGACGCTAAAAACA -3'                   |                                         |
| P2     | R 5'- GAATTCGATTCTCGAGGAGATTAATCGTGAGCGCC -3'                  |                                         |
| G3     | F 5'- AGGAGATATACTCGAATGAATTATCAGAACGACGA -3'                  |                                         |
| G4     | R 5'- GAATTCGATTCTCGATTACCCGCGACGCGCTTTTA -3'                  |                                         |
| F1     | F 5'- CTCCGCGCCGCCATGATAAACCTCTTAAGCCACGC -3'                  |                                         |
| F2     | R 5'- CCCGCGCGCCGCCATGTACGTCATCCTCGTGAGGA -3'                  |                                         |
| BD1    | F 5'- AATTACATTCTCTAGCGCAATTAATGTGAGTTAGC -3'                  | T-BD                                    |
| BD2    | R 5'- TCATGGTCATTCTAGTTATGCCTGGTGTAATAAG -3'                   |                                         |
| BD3    | R 5'- CATATGGGACCTAGGTTATGCCTGGTGTAATAAG -3'                   |                                         |
| PA1    | F 5'- CCTAGGTCCCATATGGTCGACCTGCA -3'                           | T-PA                                    |
| PA2    | R 5'- TCATGGTCATTCTAGTTATTTCTTCAGTTCAGCCA -3'                  |                                         |
| GF1    | F 5'- CCAGGCATAACCTAGTCCCATATGGTCGACCTGCA -3'                  | T-GF                                    |
| GF2    | R 5'- CCATATGGGACCTAGAAACCTCTTAAGCCACGCGA -3'                  |                                         |

Table 2. 25ml lab-scale culture. Pf, maximum DHS production (g IA/L); Xf, maximum dry cell weight (g DCW/L); Sf, final residual glucose concentration (g glucose/L); Yp/s, DHS production yield based on glucose (g DHS/g glucose); Qp, average volumetric DHS production rate (g DHS/L/h).

| Strain   | Pf   | Sf | Yp/s  | Qp    |
|----------|------|----|-------|-------|
| AB2834   | 3.54 | 0  | 0.708 | 0.037 |
| Inha 24  | 4.92 | 0  | 0.984 | 0.051 |
| Inha 29  | 5.82 | 0  | 1.164 | 0.061 |
| Inha 52  | 7.72 | 0  | 1.544 | 0.080 |
| Inha 99  | 8.06 | 0  | 1.612 | 0.084 |
| Inha 95  | 9.20 | 0  | 1.84  | 0.096 |
| Inha 103 | 9.28 | 0  | 1.856 | 0.097 |

Figure 1. Transcriptome analysis for promoter selection and pathway re-design. The red asterisk represents the selected promoter in this study (A) Cell growth of *E. coli* AB2834 and Inha52 (B) RNA expression analysis from early stage of exponential phase (AB2834, 4h; Inha52, 7h) (C) RNA expression analysis from the early stage of stationary phase (AB2834, 9h; Inha52, 12h).

**Figure 2. (A)** Schematic representation of the operons, including codon-optimized MA biosynthetic genes (*asbF*<sup>Eopt</sup>, *aroY*<sup>Eopt</sup>, *catA*<sup>Eopt</sup>) constructed in this study. **(B)** Production of metabolites by *E. coli* strains harboring gene operons (presented in panel A). Red, DHS; Green, PCA; Grey, MA.

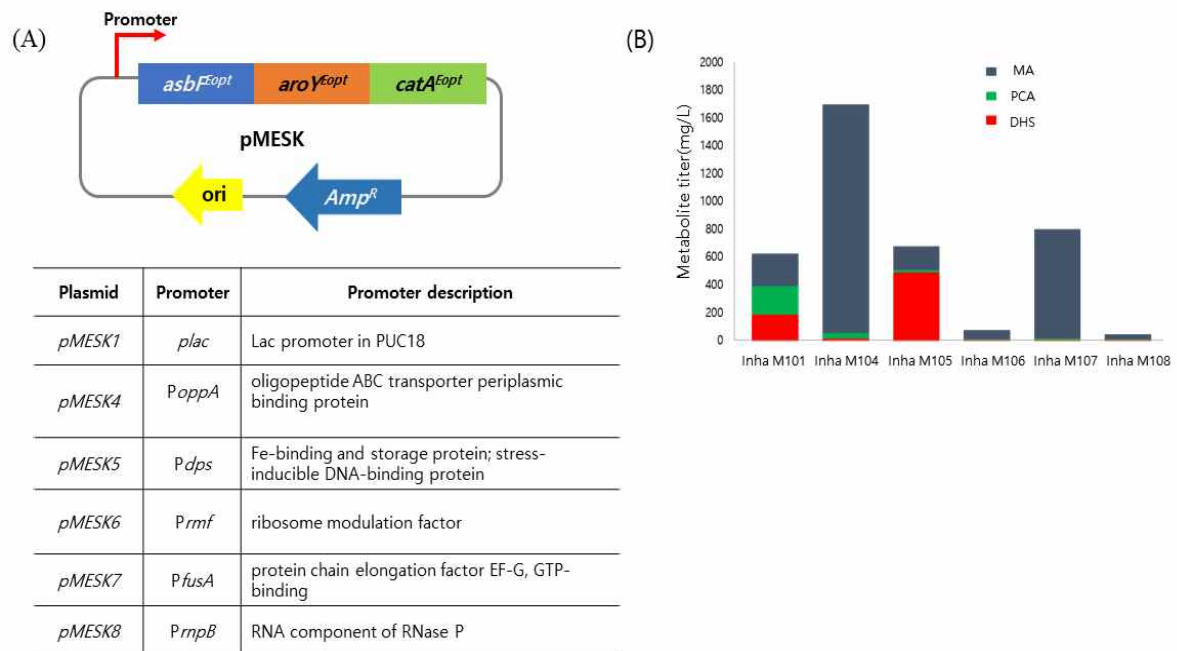

**Figure 3.** Time course profiles of cell growth (A) and DHS production(B) by serial engineered strains in the 7-L fermenter.

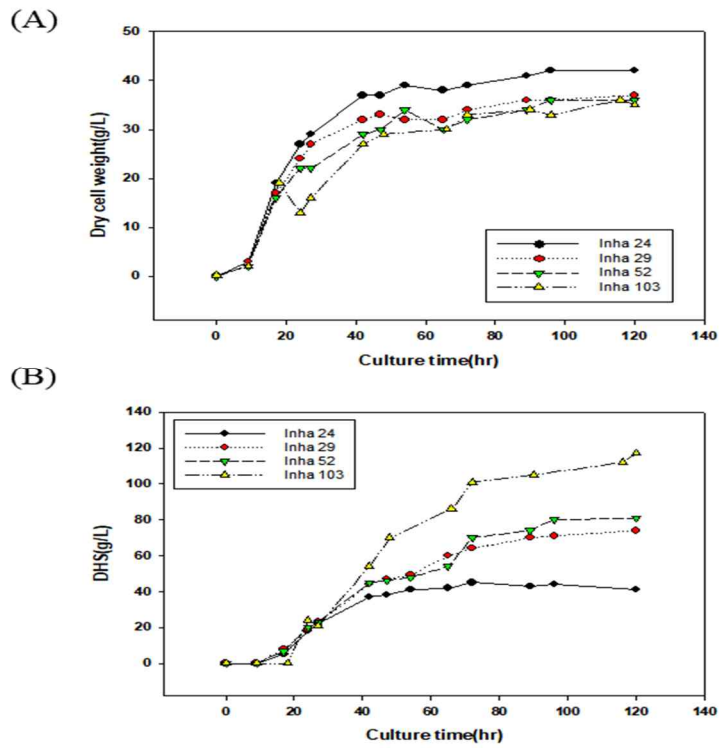

**Figure 4.** Gene expression level based on the results of RNA-seq by time course (time 1; 7hr, time 2; 12hr)

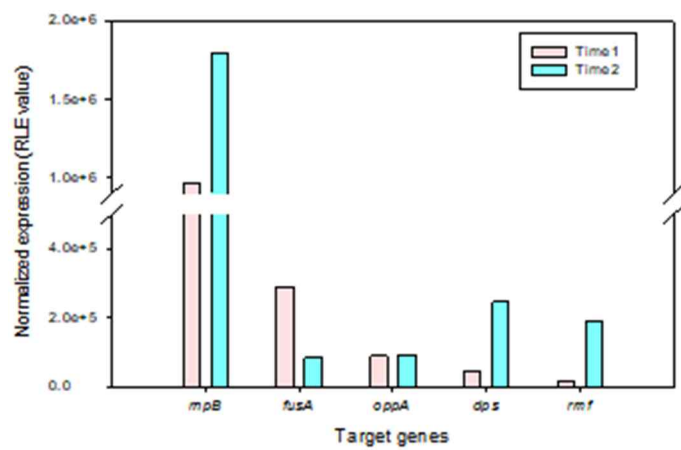

Supplement: Supplementary file [file 17937959]
